# Supplementary material for: Self-acetylation at the active site of phosphoenolpyruvate carboxykinase (PCK1) controls enzyme activity
Source: PubMed Central journal article supplement (PMC7948413; doi:10.1074/jbc.ra120.015103), 2021-01-21
Supplement: mmc1.pdf [file mmc1.pdf]

## SUPPORTING INFORMATION

### **Self-acetylation at the active site of phosphoenolpyruvate carboxykinase (PCK1) controls enzyme activity**

Pedro Latorre-Muro<sup>1†\*</sup>, Josue Baeza<sup>2</sup>, Ramon Hurtado-Guerrero<sup>1,3,4,5</sup>, Thomas Hicks<sup>6</sup>, Ignacio Delso<sup>7</sup>, Cristina Hernández-Ruiz<sup>1</sup>, Adrian Velázquez-Campoy<sup>1,5,8,9,10</sup>, Alexis J. Lawton<sup>2</sup>, Jesús Angulo<sup>6,11,12</sup>, John M. Denu<sup>2</sup> and José A. Carrodegua<sup>1,8,10\*</sup>

Material included:

- Figures S1 to S8.
- Tables S1 to S3. Supplemental information to Table S2 included in additional spreadsheet.

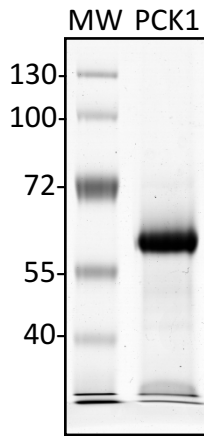

**Figure S1.** 10% SDS-PAGE gel of human PCK1 purified from *E. coli*. Numbers on the left refer to MW of markers run alongside, in kDa.

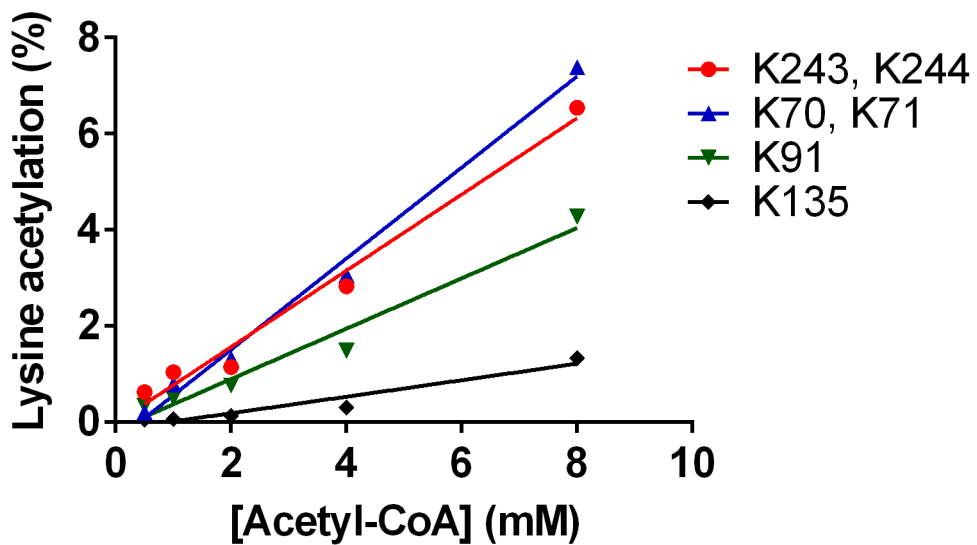

**Figure S2.** PCK1 chemical acetylation under different concentrations of acetyl-CoA. PCK1 was incubated in the presence of acetyl-CoA (0.5 to 8 mM). Acetylation on different residues was detected by MS and stoichiometry (%) calculated. As can be seen, each residue had different susceptibility to react with acetyl-CoA.

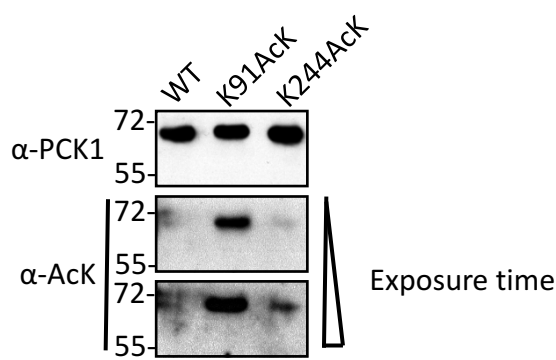

**Figure S3. Anti-acetyl-lysine antibody (CST 9814) sensitivity to different acetyl-lysine targets.** Two acetylated variants (K91AcK and K244AcK) were probed with the anti-acetyl-lysine antibody used in this work in order to determine possible differences in sensitivity.

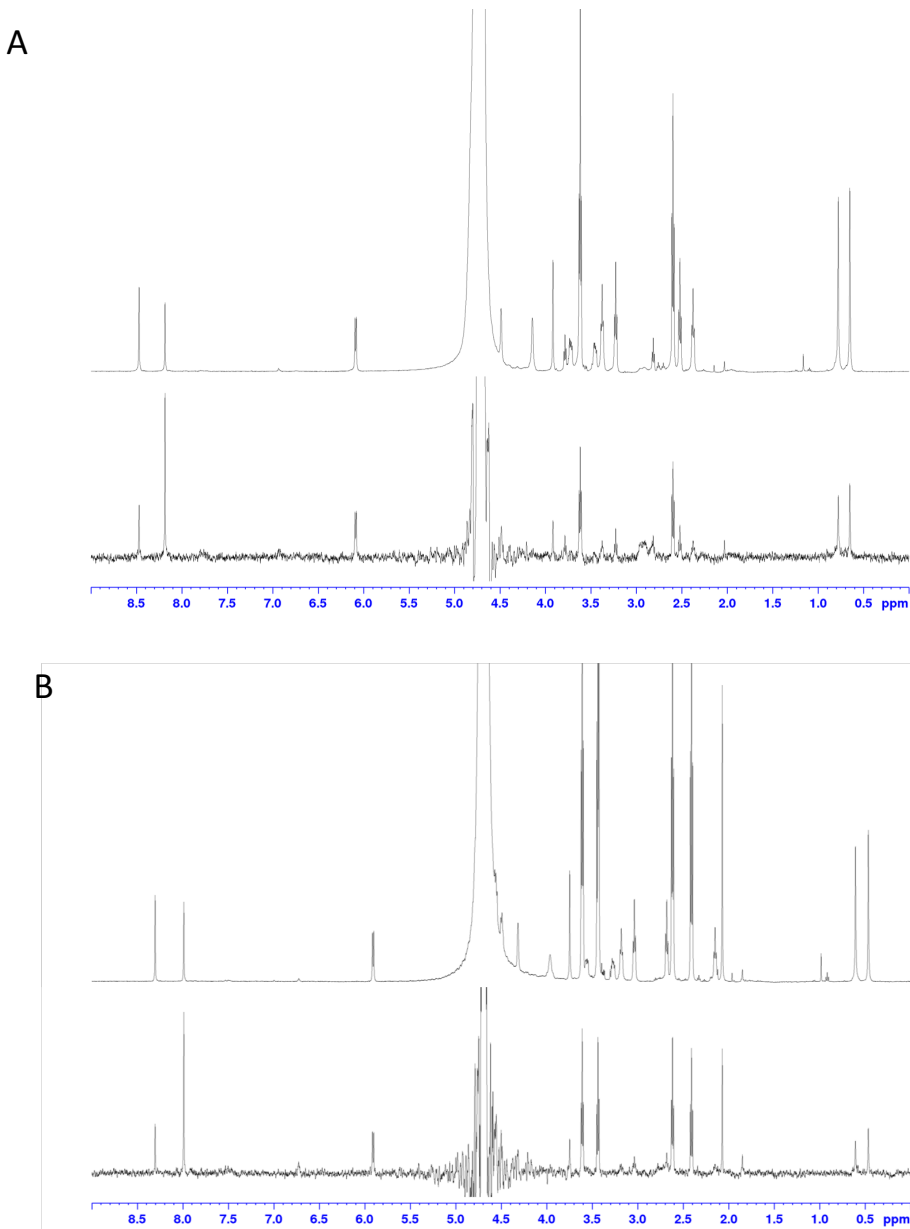

**Figure S4. Representative STD NMR spectra (500 MHz) of (A) CoA and (B) Acetyl-CoA at 1 mM in the presence of 40  $\mu$ M Pck1 at 283 K.** In both cases, lower spectra correspond to the off-resonance experiment (reference) and the upper ones to the difference (STD) spectra.

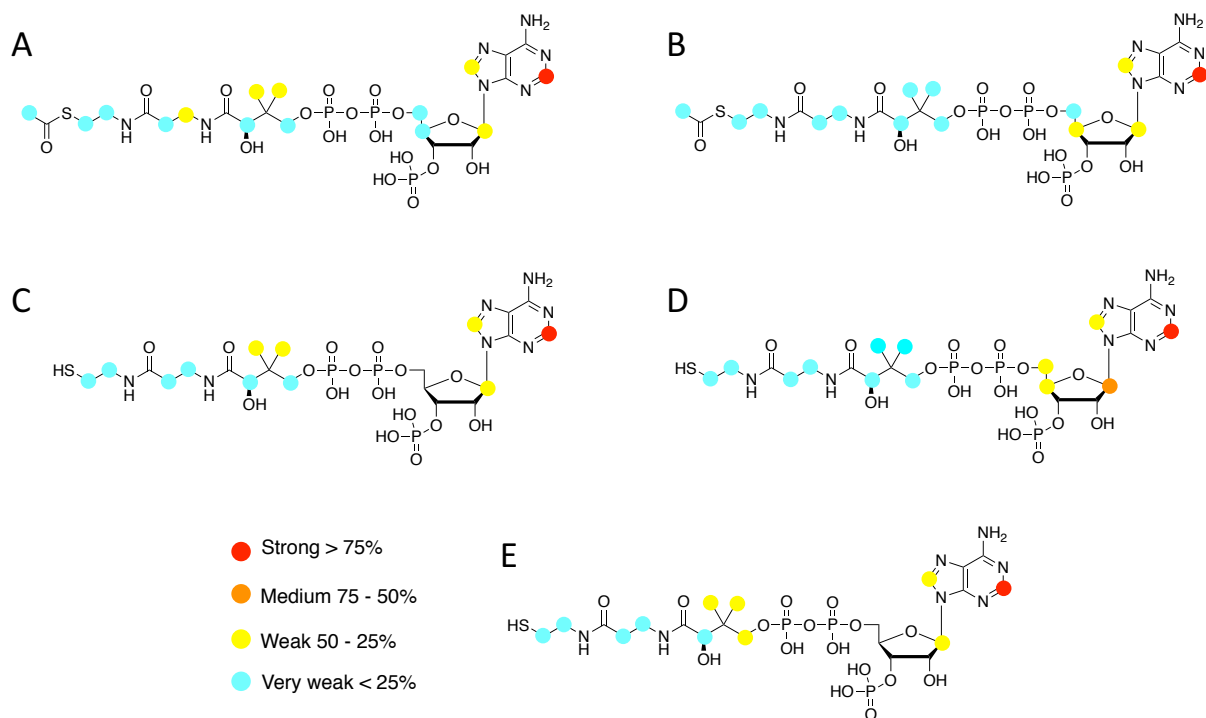

**Figure S5. Mapping of ligand binding epitopes for their interactions with PCK1 by STD NMR.** (A) AcCoA, saturation frequency -1 ppm. (B) AcCoA, saturation frequency 7.19 ppm. (C) CoA, saturation frequency -1 ppm. (D) CoA, saturation frequency 7.19 ppm. (E) CoA, MgCl<sub>2</sub> 1 mM, saturation frequency -1 ppm. The colored spheres represent the normalized STD-NMR intensity. Only STD responses are indicated for those protons that could accurately be measured.

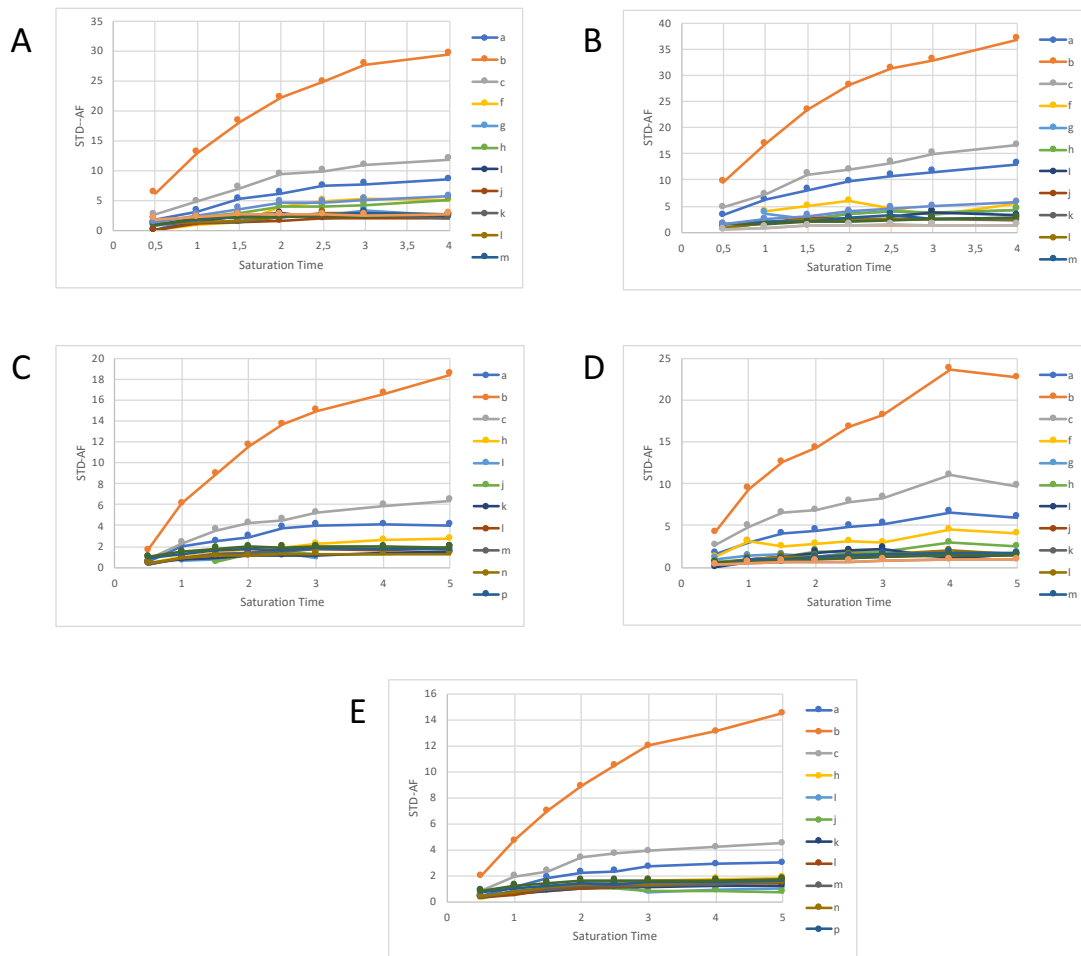

**Figure S6. STD NMR build-up curves for each ligand in complex with PCK1, at different frequencies and in the presence of  $MgCl_2$ .** (A) AcCoA, saturation frequency -1 ppm. (B) AcCoA, saturation frequency 7.19 ppm (C) CoA, saturation frequency - 1 ppm. (D) CoA, saturation frequency 7.19 ppm. (E) CoA,  $MgCl_2$  1 mM, saturation frequency - 1 ppm. Initial slopes were calculated and normalized to determine the epitope mappings.

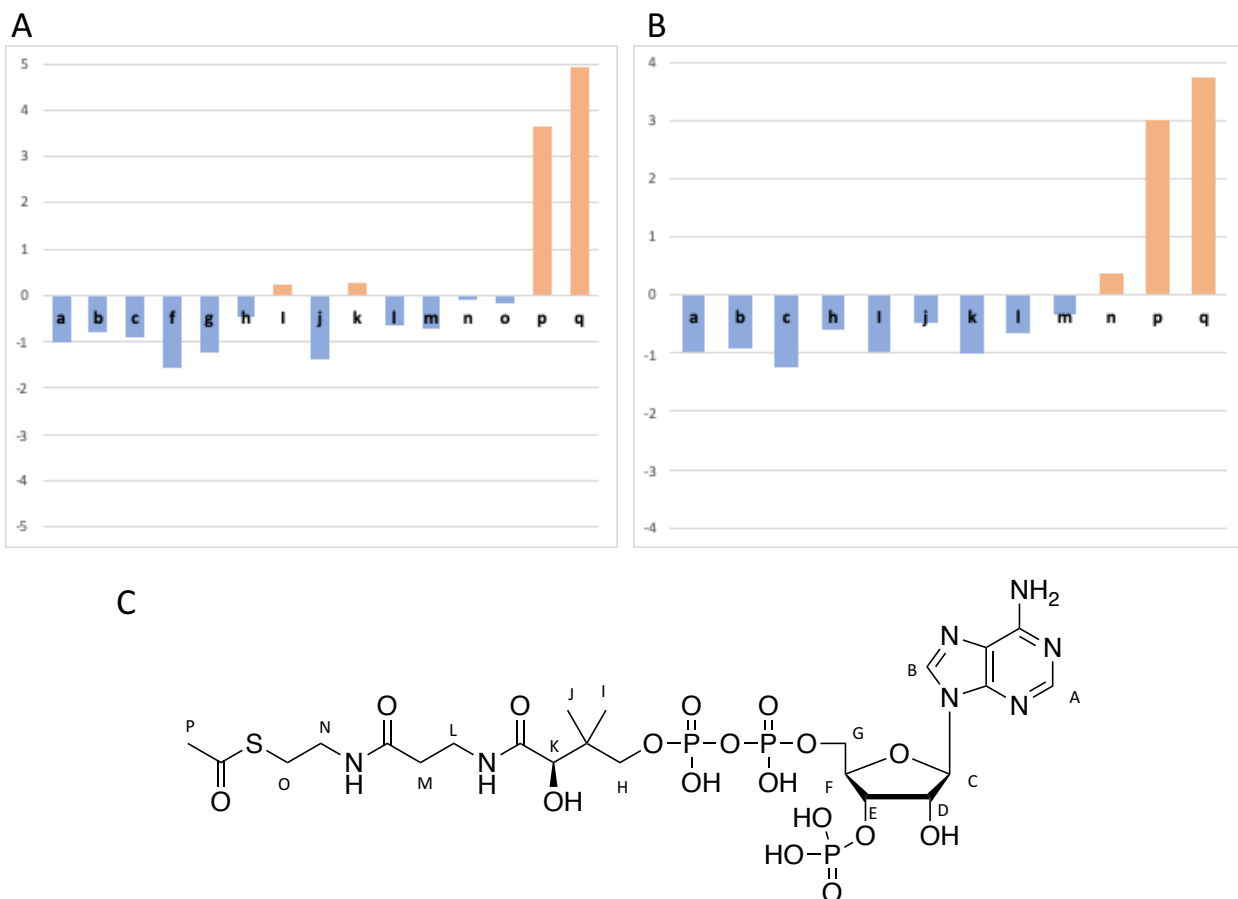

**Figure S7. Differential Epitope Mapping histograms (-1/7.19 ppm) for each ligand in complex to PCK1.** (A) AcCoa/PCK1 complex. (B) CoA/PCK1 complex. Positive  $\Delta$ STDs shown in orange indicate ligand protons oriented toward aliphatic protein side chains in the binding pocket ( $\delta = -1$  ppm), and negative  $\Delta$ STDs, in blue, highlight ligand protons oriented toward aromatic side chains ( $\delta = 7.19$  ppm).  $\Delta$ STD values are calculated following described method. (C) Key with letter code.

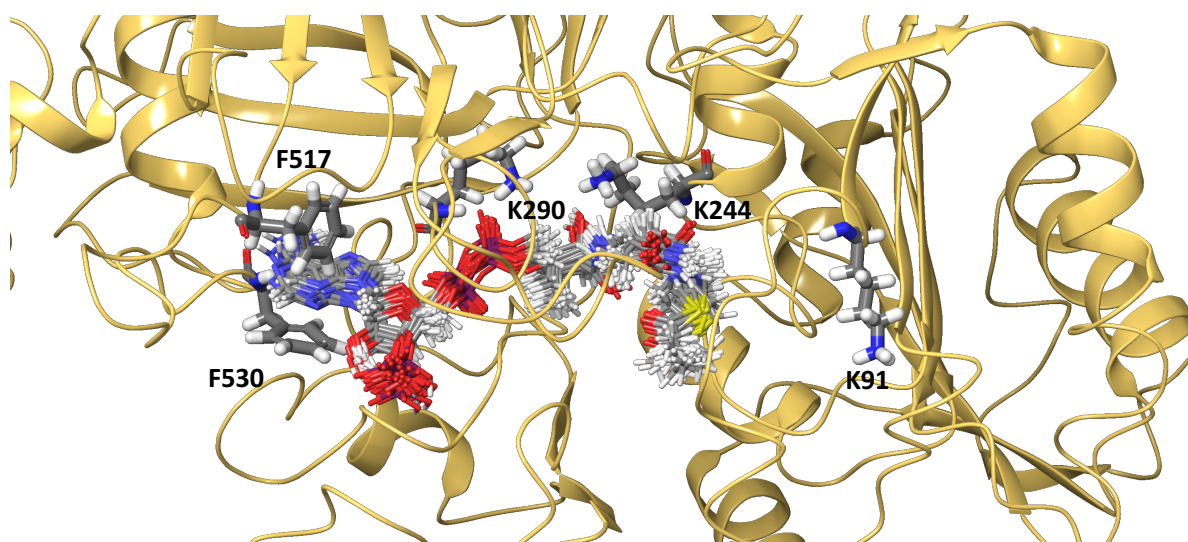

**Figure S8. 3D molecular model of the Pck1-AcCoA complex.** Superposition of 25 frames from a short 5ns MD simulation.

| <b>Table S1. Kinetic characterization of Pck1 WT and Pck1 WT incubated in the presence of sodium acetate (NaAc-treated) acetyl-CoA (AcCoA-treated) or acetyl CoA and p300 (p300-treated).</b> |                                                                         |                       |                       |                       |                       |
|-----------------------------------------------------------------------------------------------------------------------------------------------------------------------------------------------|-------------------------------------------------------------------------|-----------------------|-----------------------|-----------------------|-----------------------|
| <b>Substrate</b>                                                                                                                                                                              | <b>Parameter</b>                                                        | <b>WT</b>             | <b>NaAc-treated</b>   | <b>AcCoA-treated</b>  | <b>P300-treated</b>   |
| <b>A) OAA+GTP → PEP+GDP+CO<sub>2</sub></b>                                                                                                                                                    |                                                                         |                       |                       |                       |                       |
| <b>OAA</b>                                                                                                                                                                                    | <i>K<sub>m</sub></i> (μM)                                               | 45±9                  | 45±8                  | 65±16                 | 81±16                 |
|                                                                                                                                                                                               | <i>k<sub>cat</sub></i> (s <sup>-1</sup> )                               | 45±2                  | 39±1.5                | 13±1                  | 11±1                  |
|                                                                                                                                                                                               | <i>k<sub>cat</sub>/K<sub>m</sub></i> (M <sup>-1</sup> s <sup>-1</sup> ) | 1 x 10 <sup>6</sup>   | 9 x 10 <sup>5</sup>   | 2 x 10 <sup>5</sup>   | 1.4 x 10 <sup>5</sup> |
| <b>GTP</b>                                                                                                                                                                                    | <i>K<sub>m</sub></i> (μM)                                               | 258±46                | 294±60                | 305±89                | 403±143               |
|                                                                                                                                                                                               | <i>k<sub>cat</sub></i> (s <sup>-1</sup> )                               | 41±3                  | 44±3                  | 7.3±0.9               | 9.5±1.5               |
|                                                                                                                                                                                               | <i>k<sub>cat</sub>/K<sub>m</sub></i> (M <sup>-1</sup> s <sup>-1</sup> ) | 1.6 x 10 <sup>5</sup> | 1.5 x 10 <sup>5</sup> | 2.4 x 10 <sup>4</sup> | 2.4 x 10 <sup>4</sup> |
| <b>B) PEP+GDP+CO<sub>2</sub> → OAA+GTP</b>                                                                                                                                                    |                                                                         |                       |                       |                       |                       |
| <b>PEP</b>                                                                                                                                                                                    | <i>K<sub>m</sub></i> (μM)                                               | 532±75                | 499±86                | 423±131               | 106±25                |
|                                                                                                                                                                                               | <i>k<sub>cat</sub></i> (s <sup>-1</sup> )                               | 19±1                  | 20±1.3                | 6.3±0.6               | 8.1±0.5               |
|                                                                                                                                                                                               | <i>k<sub>cat</sub>/K<sub>m</sub></i> (M <sup>-1</sup> s <sup>-1</sup> ) | 3.6 x 10 <sup>4</sup> | 4 x 10 <sup>4</sup>   | 1.5 x 10 <sup>4</sup> | 7.6 x 10 <sup>4</sup> |
| <b>GDP</b>                                                                                                                                                                                    | <i>K<sub>m</sub></i> (μM)                                               | 87±10                 | 61±14                 | 64±11                 | 50±9                  |
|                                                                                                                                                                                               | <i>k<sub>cat</sub></i> (s <sup>-1</sup> )                               | 19±1                  | 18±1.2                | 4.5±0.3               | 9.8±0.5               |
|                                                                                                                                                                                               | <i>k<sub>cat</sub>/K<sub>m</sub></i> (M <sup>-1</sup> s <sup>-1</sup> ) | 2.2 x 10 <sup>5</sup> | 3 x 10 <sup>5</sup>   | 8.3 x 10 <sup>4</sup> | 1.6 x 10 <sup>5</sup> |
| <b>KHCO<sub>3</sub></b>                                                                                                                                                                       | <i>K<sub>m</sub></i> (mM)                                               | 14±2.2                | 12.6±1                | 8.7±2.7               | 11±2.6                |
|                                                                                                                                                                                               | <i>k<sub>cat</sub></i> (s <sup>-1</sup> )                               | 19±1                  | 22±1.1                | 6±0.7                 | 11±1                  |
|                                                                                                                                                                                               | <i>k<sub>cat</sub>/K<sub>m</sub></i> (M <sup>-1</sup> s <sup>-1</sup> ) | 1.4 x 10 <sup>3</sup> | 1.7 x 10 <sup>3</sup> | 7 x 10 <sup>2</sup>   | 1.1 x 10 <sup>3</sup> |

**Table S2. Determination of lysine acetylation stoichiometry for PCK1 peptides (see supplementary spreadsheet)**



| <b>Table S3. Data collection and refinement statistics.</b><br>Values in parentheses refer to the highest resolution shell.<br>Ramachandran plot statistics were determined with PROCHECK. |                                                            |
|--------------------------------------------------------------------------------------------------------------------------------------------------------------------------------------------|------------------------------------------------------------|
|                                                                                                                                                                                            | PCK1-K244AcK                                               |
| Space group                                                                                                                                                                                | P2 <sub>1</sub> 2 <sub>1</sub> 2 <sub>1</sub>              |
| Wavelength (Å)                                                                                                                                                                             | 0.97                                                       |
| Resolution (Å)                                                                                                                                                                             | 20-1.75<br>(1.85-1.75)                                     |
| Cell dimensions<br>a, b, c (Å)<br>$\alpha$ , $\beta$ , $\gamma$ (°)                                                                                                                        | $a = 60.38$<br>$B = 85.22$<br>$c = 119.67$<br>$90, 90, 90$ |
| Mn(I) half-set correlation<br>CC(1/2)                                                                                                                                                      | 0.996 (0.522)                                              |
| Unique reflections                                                                                                                                                                         | 55039                                                      |
| Completeness                                                                                                                                                                               | 87.30 (99.8)                                               |
| $R_{\text{pim}}$                                                                                                                                                                           | 0.043 (0.258)                                              |
| $I/\sigma(I)$                                                                                                                                                                              | 13.2 (2.7)                                                 |
| Redundancy                                                                                                                                                                                 | 5.7 (5.9)                                                  |
| $R_{\text{work}} / R_{\text{free}}$                                                                                                                                                        | 0.170/0.211                                                |
| RMSD from ideal<br>geometry, bonds (Å)                                                                                                                                                     | 0.0118                                                     |
| RMSD from ideal<br>geometry, angles (°)                                                                                                                                                    | 1.574                                                      |
| $\langle B \rangle$ PCK1-K244AcK (Å <sup>2</sup> )                                                                                                                                         | 23.91                                                      |
| $\langle B \rangle$ solvent (Å <sup>2</sup> )                                                                                                                                              | 33.44                                                      |
| PDB ID                                                                                                                                                                                     | 6YI9                                                       |
